# Supplementary material for: Azepine-Indole Alkaloids From Psychotria nemorosa Modulate 5-HT2A Receptors and Prevent in vivo Protein Toxicity in Transgenic Caenorhabditis elegans
Source: PubMed Central journal article supplement (PMC8963987; doi:10.3389/fnins.2022.826289), 2022-03-14
Supplement: Data_Sheet_1.pdf [file Data_Sheet_1.pdf]

## Supplementary Material

**Table S1.** Top 20 ranked targets for nemorosine A (1).

| 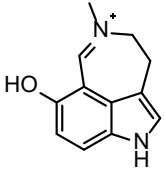   | Chembl ID     | TC score (1) | Target                                                           | Role                                        | Significance in neurodegenerative diseases |
|-------------------------------------------------------------------------------------|---------------|--------------|------------------------------------------------------------------|---------------------------------------------|--------------------------------------------|
|    | CHEMBL576321  | 1,60         | IDO<br>CHEMBL4685                                                | tryptophan-metabolism                       | 1-3                                        |
|  | CHEMBL206816  | 1,59         | IDO1<br>CHEMBL1075294                                            | tryptophan-metabolism                       |                                            |
|  | CHEMBL1446983 | 1,54         | female germline-specific tumor suppressor gld-1<br>CHEMBL1293302 | entry into meiosis<br>( <i>C. elegans</i> ) | -                                          |
|  | CHEMBL49309   | 1,52         | 5-HTR 2<br>CHEMBL2093870                                         | serotonergic system                         | 4-7                                        |
|                                                                                     |               |              | 5-HTR 1<br>CHEMBL2095159                                         | serotonergic system                         |                                            |

|                                                                                     |               |      |                                                     |                                                  |     |
|-------------------------------------------------------------------------------------|---------------|------|-----------------------------------------------------|--------------------------------------------------|-----|
| 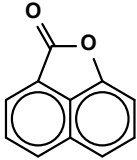   | CHEMBL2323363 | 1,52 | thymidylate synthase<br><br>CHEMBL1952              | DNA<br><br>biosynthesis                          | -   |
|    | CHEMBL1998253 | 1,51 | DYRK1A<br><br>CHEMBL2292                            | cell cycle control<br><br>cell differentiation   | 8   |
|                                                                                     |               |      | NEK2<br><br>CHEMBL3835                              | cell cycle control                               | -   |
|                                                                                     |               |      | LIMK1<br><br>CHEMBL3836                             | cytoskeleton<br>architecture                     | -   |
|                                                                                     |               |      | CLK4<br><br>CHEMBL1998253                           | spliceosome<br>regulation                        | -   |
|                                                                                     |               |      | CHECK1<br><br>CHEMBL4630                            | DNA damage<br>response<br><br>cell cycle control | -   |
|  | CHEMBL1203602 | 1,51 | adrenergic receptor $\alpha 2$<br><br>CHEMBL2093864 | norepinephrine<br>system                         | 9   |
|                                                                                     |               |      | 5-HT1aR<br><br>CHEMBL273                            | serotonergic system                              | 4-7 |

|                                                                                     |              |      |                                                   |                           |       |
|-------------------------------------------------------------------------------------|--------------|------|---------------------------------------------------|---------------------------|-------|
| 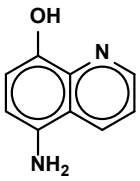   | CHEMBL449298 | 1,51 | TDO<br>CHEMBL1075307                              | tryptophan-<br>metabolism | 10,11 |
|                                                                                     |              |      | HSP90<br>CHEMBL2095165                            | chaperone                 | 12    |
|                                                                                     |              |      | proteasome macropain<br>subunit MB1<br>CHEMBL4662 | protein degradation       | 13    |
|    | CHEMBL608994 | 1,50 | PARP1<br>CHEMBL3105                               | DNA repair                | 14-16 |
|   | CHEMBL103583 | 1,48 | CRF-BP<br>CHEMBL3885546                           | stress response           | 17,18 |
|  | CHEMBL122451 | 1,48 | COX<br>CHEMBL2096674                              | inflammation              | 19,20 |
|                                                                                     |              | 1,48 | 5-LO<br>CHEMBL312                                 | inflammation              | 21,22 |

**Table S2.** Top 20 ranked targets for fargesine (2).

| 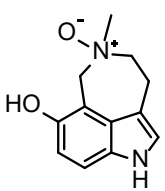   | <b>Chembl ID</b> | <b>TC score (2)</b> | <b>Target</b>                                   | <b>Role</b>           | <b>Significance in neurodegenerative diseases</b> |
|-------------------------------------------------------------------------------------|------------------|---------------------|-------------------------------------------------|-----------------------|---------------------------------------------------|
|    | CHEMBL576321     | 1,47                | IDO<br>CHEMBL4685                               | tryptophan-metabolism | 1-3                                               |
|   | CHEMBL206816     | 1,47                | IDO1<br>CHEMBL1075294                           | tryptophan-metabolism |                                                   |
|  | CHEMBL1203602    | 1,44                | adrenergic receptor $\alpha 2$<br>CHEMBL2093864 | norepinephrine system | 9                                                 |
|                                                                                     |                  |                     | 5-HT1aR<br>CHEMBL273                            | serotonergic system   | 4-7                                               |
|  | CHEMBL49309      | 1,44                | 5-HTR 2<br>CHEMBL2093870                        | serotonergic system   | 4-7                                               |
|                                                                                     |                  |                     | 5-HTR 1<br>CHEMBL2095159                        | serotonergic system   |                                                   |

|                                                                                     |               |      |                                                                      |                                                 |       |
|-------------------------------------------------------------------------------------|---------------|------|----------------------------------------------------------------------|-------------------------------------------------|-------|
| 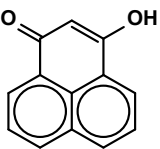   | CHEMBL1446983 | 1,41 | female germline-specific tumor suppressor gld-1<br><br>CHEMBL1293302 | entry into meiosis<br><br>( <i>C. elegans</i> ) | -     |
|    | CHEMBL449298  | 1,40 | TDO<br>CHEMBL1075307                                                 | tryptophan-metabolism                           | 10,11 |
|                                                                                     |               |      | HSP90<br>CHEMBL2095165                                               | chaperone                                       | 12    |
|                                                                                     |               |      | proteasome macropain subunit MB1<br>CHEMBL4662                       | protein degradation                             | 13    |
|    | CHEMBL2323363 | 1,38 | thymidylate synthase<br><br>CHEMBL1952                               | DNA<br>biosynthesis                             | -     |
|  | CHEMBL1998253 | 1,38 | DYRK1A<br>CHEMBL2292                                                 | cell cycle control<br>cell differentiation      | 8     |
|                                                                                     |               |      | NEK2<br>CHEMBL3835                                                   | cell cycle control                              | -     |
|                                                                                     |               |      | LIMK1<br>CHEMBL3836                                                  | cytoskeleton architecture                       | -     |
|                                                                                     |               |      | CLK4<br>CHEMBL1998253                                                | spliceosome regulation                          | -     |
|                                                                                     |               |      | CHECK1<br>CHEMBL4630                                                 | DNA damage response<br>cell cycle control       | -     |

|                                                                                     |               |      |                                     |                                   |       |
|-------------------------------------------------------------------------------------|---------------|------|-------------------------------------|-----------------------------------|-------|
| 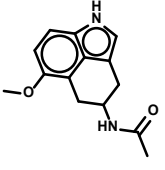   | CHEMBL61418   | 1,38 | melatonin receptor<br>CHEMBL2094268 | entraining sleep/wake             | 7,23  |
|    | CHEMBL33103   | 1,37 | melatonin receptor<br>CHEMBL2095154 | entraining sleep/wake             | 7,23  |
|    | CHEMBL1328384 | 1,37 | streptokinase A                     | thrombolytic medication           | -     |
|  | CHEMBL274056  | 1,37 | 5-LO<br>CHEMBL2980                  | inflammation                      | 21,22 |
|                                                                                     |               |      | CDC25B<br>CHEMBL4804                | cell cycle control                | -     |
|                                                                                     |               |      | DUSP6<br>CHEMBL5511                 | negative feedback of MAPK pathway |       |
|                                                                                     |               |      | DUSP1<br>CHEMBL5623                 | negative feedback of MAPK pathway | 24    |

## Abbreviations.

5-HTR, 5-hydroxytryptamine receptor; 5-LO, arachidonate 5-lipoxygenase; CHECK1, serine/threonine-protein kinase Chk1, CDC25B, dual specificity phosphatase CDC25B; CLK4, dual specificity protein kinase CLK4; COX, cyclooxygenase; CRF-BP, corticotropin-releasing factor receptor 2/corticotropin-releasing factor-binding protein; DUSP1, Dual specificity protein phosphatase 1; DUSP6 Dual specificity protein phosphatase 6; DYRK1A, dual-specificity tyrosine-phosphorylation regulated kinase 1A; HSP90, heat shock protein 90; IDO, indolamin-2,3-dioxygenase; LIMK1, LIM domain kinase 1; NEK2, serine/threonine-protein kinase NEK2; PARP1, poly[ADP-ribose]polymerase-1; TC, Tanimoto combo; TDO, tryptophan 2,3-dioxygenase

## **References**

1. Bonda, D. J. *et al.* Indoleamine 2,3-dioxygenase and 3-hydroxykynurenine modifications are found in the neuropathology of Alzheimer's disease. *Redox Rep.* **15**, 161–168 (2010).
2. Maramai, S., Benchekroun, M., Gabr, M. T. & Yahiaoui, S. Multitarget therapeutic strategies for Alzheimer's disease: Review on emerging target combinations. *Biomed Res. Int.* **2020**, ID 5120230 (2020).
3. Campbell, B. M., Charych, E., Lee, A. W. & Möller, T. Kynurenines in CNS disease: Regulation by inflammatory cytokines. *Front. Neurosci.* **8**, 1–22 (2014).
4. Sierksma, A. S. R., van den Hove, D. L. A., Steinbusch, H. W. M. & Prickaerts, J. Major depression, cognitive dysfunction and Alzheimer's disease: Is there a link? *Eur. J. Pharmacol.* **626**, 72–82 (2010).
5. Isooka, N. *et al.* Dopaminergic neuroprotective effects of rotigotine via 5-HT<sub>1A</sub> receptors: Possibly involvement of metallothionein expression in astrocytes. *Neurochem. Int.* **132**, 104608 (2020).
6. Kikuoka, R. *et al.* Mirtazapine exerts astrocyte-mediated dopaminergic neuroprotection. *Sci. Rep.* **10**, 1–15 (2020).
7. Herrera-Arozamena, C., Martí-Marí, O., Estrada, M., De La Revenga, M. F. & Rodríguez-Franco, M. I. Recent advances in neurogenic small molecules as innovative treatments for neurodegenerative diseases. *Molecules* **21**, 1165 (2016).
8. Jarhad, D. B., Mashelkar, K. K., Kim, H. R., Noh, M. & Jeong, L. S. Dual-specificity tyrosine phosphorylation-regulated kinase 1A (DYRK1A) inhibitors as potential therapeutics. *J. Med. Chem.* **61**, 9791–9810 (2018).
9. Tatton, W., Chen, D., Redman, R. C., Wheeler, L., Nixon, R. & Tatton N. Hypothesis for a common basis for neuroprotection in glaucoma and Alzheimer's disease: Anti-apoptosis by alpha-2-adrenergic receptor activation. *Surv. Ophthalmol.* **48**, S25-37 (2003).
10. Van der Goot, A. T., Zhu, W., Vázquez-Manrique, R. P., Seinstra, R. I., Dettmer, K., Michels, H., Farina, F., Krijnen, J., Melki, R., Buijsman, R. C., Silva, M. R., Thijssen, K. L., Kema, I. P., Neri, C., Oefner, P. J. & Nollen, E. A. A. Delaying aging and the aging-associated decline in protein homeostasis by inhibition of tryptophan degradation. *Proc. Natl. Acad. Sci. U. S. A.* **109**,

14912–14917 (2012).

11. Sorgdrager, F. J. H., van Der Ley, C. P., van Faassen, M., Calus, E., Nollen, E. A., Kema, I. P., van Dam, D. & De Deyn, P. P. The effect of tryptophan 2,3-dioxygenase inhibition on kynurenine metabolism and cognitive function in the APP23 mouse model of Alzheimer's disease. *Int. J. Tryptophan Res.* **13**, 1178646920972657 (2020).
12. Pratt, W. B., Gestwicki, J. E., Osawa, Y. & Lieberman, A. P. Targeting Hsp90/Hsp70-based protein quality control for treatment of adult onset neurodegenerative diseases. *Annu. Rev. Pharmacol. Toxicol.* **55**, 353–371 (2015).
13. Bi, M., Du, X., Jiao, Q., Chen, X. & Jiang, H. Expanding the role of proteasome homeostasis in Parkinson's disease: Beyond protein breakdown. *Cell Death Dis.* **12**, 154 (2021).
14. Mao, K. & Zhang, G. The role of PARP1 in neurodegenerative diseases and aging. *FEBS J.* 1–12 (2021).
15. Martire, S., Mosca, L. & Erme, M. PARP-1 involvement in neurodegeneration : A focus on Alzheimer ' s and Parkinson ' s diseases. **148**, 53–64 (2015).
16. Lee, Y., Kang, H. C., Lee, B. D., Lee, Y. I., Kim, Y. P. & Shin, J. H. Poly (ADP-ribose) in the pathogenesis of Parkinson's disease. *BMB Rep.* **47**, 424–432 (2014).
17. Kempuraj, D., Selvakumar, G. P., Thangavel, R., Ahmed, M. E., Zaheer, S., Raikwar, S. P., Iyer, S. S., Bhagavan, S. M., Beladakere-Ramaswamy, S. & Zaheer, A. Mast cell activation in brain injury, stress, and post-traumatic stress disorder and Alzheimer's disease pathogenesis. *Front. Neurosci.* **11**, 1–15 (2017).
18. Vandael, D. & Gounko, N. V. Corticotropin releasing factor-binding protein (CRF-BP) as a potential new therapeutic target in Alzheimer's disease and stress disorders. *Transl. Psychiatry* **9**, 272, (2019).
19. Teismann, P., Tieu, K., Choi, D. K., Wu, D. C., Naini, A., Hunot, S., Vila, M., Jackson-Lewis, V. & Przedborski, S. Cyclooxygenase-2 is instrumental in Parkinson's disease neurodegeneration. *Proc. Natl. Acad. Sci. U. S. A.* **100**, 5473–5478 (2003).
20. Minghetti, L. Cyclooxygenase-2 (COX-2) in inflammatory and degenerative brain diseases. *J. Neuropathol. Exp. Neurol.* **63**, 901–910 (2004).
21. Michael, J., Marschallinger, J. & Aigner, L. The leukotriene signaling pathway: a druggable target in Alzheimer's disease. *Drug Discov. Today* **24**, 505–516 (2019).
22. Siddiqui, A., Akhtar, M. S., Shah, Z., Othman, I. & Kumari, Y. Inflammation drives Alzheimer's disease: Emphasis on 5-lipoxygenase pathways. *Curr. Neuropharmacol.* **18**, 885-895 (2020).
23. Zlotos, D. P., Jockers, R., Cecon, E., Rivara, S. & Witt-enderby, P. A. MT 1 and MT 2 melatonin receptors : Ligands , models , oligomers , and therapeutic potential. *J. Med. Chem.* **57**, 3161-3185 (2014).



24. Pérez-Sen, R. Queipo, M. J., Gil-Redondo, J. C., Ortega, F., Gómez-Villafuertes, R., Miras-Portugal, M.T. & Delicado, E. G. Dual-specificity phosphatase regulation in neurons and glial cells. *Int. J. Mol. Sci.* **20**, 1–23 (2019).

**Table S3.** Results of the *C. elegans* assays related to protein toxicity with mean values and standard deviations.

|                                    | Concentration | Paralysis Assay        | $\alpha$ -Synuclein Assay           | MT Assay                             |
|------------------------------------|---------------|------------------------|-------------------------------------|--------------------------------------|
|                                    |               | paralyzed on day 2 (%) | Fluorescence (% of vehicle control) | Fluorescence (% of positive control) |
| Vehicle ctrl                       | 1% DMSO       | 83.9 $\pm$ 2.3         | 100 $\pm$ 20                        | -8.6 $\pm$ 6.9                       |
| Levodopa<br>(pos ctrl PD)          | 2 mM          | N.T.                   | -14.6 $\pm$ 23.8**                  | N.T.                                 |
| Quercetin<br>(pos ctrl AD)         | 10 $\mu$ M    | 69.5 $\pm$ 9.3         | N.T.                                | N.T.                                 |
| ZnSO <sub>4</sub><br>(pos ctrl MT) | 10 $\mu$ M    | N.T.                   | N.T.                                | 100 $\pm$ 29.4***                    |
| Nemorosine A<br>(1)                | 10 $\mu$ M    | 73.8 $\pm$ 5,7         | -23.0 $\pm$ 39.5**                  | 81.1 $\pm$ 9.8**                     |
|                                    | 100 $\mu$ M   | 51.0 $\pm$ 11.2*       | 36.2 $\pm$ 25.9                     | 14.0 $\pm$ 30.28                     |
| Fargesine (2)                      | 10 $\mu$ M    | 61.0 $\pm$ 13.8        | -28.7 $\pm$ 10.7**                  | 182.0 $\pm$ 30.6***                  |
|                                    | 100 $\mu$ M   | 70.8 $\pm$ 7,3         | 48.1 $\pm$ 48.0                     | 87.1 $\pm$ 21.1**                    |

N.T.: not tested. \*  $p < 0.05$ ; \*\*  $p < 0.01$ ; \*\*\*  $p < 0.001$
